# Supplementary material for: Long-Term Assessment of Surface Water Quality in a Highly Managed Estuary Basin
Source: MDPI journal article supplement (doi:10.3390/ijerph18179417), 2021-09-06
Supplement: s1 [file s1]

**Table S1.** Percentage of data below the detection limit (BDL) and number of samples (N) for each station and variable.

1

|                              | GORDYRD |     | C24S49 |     | C23S48 |     | C44S80 |     | SE 09 |     | SE 06 |     | SE 03 |     | SE 02 |     | SE 01 |     | SE 11 |     |
|------------------------------|---------|-----|--------|-----|--------|-----|--------|-----|-------|-----|-------|-----|-------|-----|-------|-----|-------|-----|-------|-----|
|                              | % BDL   | N   | % BDL  | N   | % BDL  | N   | % BDL  | N   | % BDL | N   | % BDL | N   | % BDL | N   | % BDL | N   | % BDL | N   | % BDL | N   |
| NH <sub>3</sub> <sup>+</sup> | 0       | 242 | 11     | 231 | 12     | 221 | 11     | 233 | 11    | 213 | 9     | 175 | 8     | 212 | 14    | 206 | 23    | 204 | 36    | 202 |
| Color                        | 0       | 252 | 0      | 241 | 0      | 232 | 0      | 245 | 0     | 223 | 0     | 193 | 0     | 225 | 1     | 223 | 13    | 222 | 26    | 222 |
| DO                           | 0       | 257 | 0      | 238 | 0      | 231 | 0      | 241 | 0     | 222 | 0     | 191 | 0     | 222 | 0     | 225 | 0     | 221 | 0     | 224 |
| N+N                          | 2       | 249 | 28     | 231 | 23     | 226 | 13     | 242 | 11    | 220 | 29    | 186 | 11    | 221 | 20    | 217 | 30    | 216 | 33    | 216 |
| pH                           | 0       | 259 | 0      | 240 | 0      | 232 | 0      | 246 | 0     | 225 | 0     | 194 | 0     | 224 | 0     | 224 | 0     | 224 | 0     | 224 |
| OP                           | 0       | 252 | 1      | 239 | 0      | 232 | 0      | 245 | 0     | 220 | 0     | 190 | 0     | 222 | 0     | 222 | 1     | 219 | 6     | 220 |
| TP                           | 0       | 260 | 0      | 242 | 0      | 234 | 0      | 246 | 0     | 218 | 0     | 188 | 0     | 220 | 0     | 219 | 0     | 216 | 0     | 211 |
| Sp. Con.                     | 0       | 258 | 0      | 241 | 0      | 233 | 0      | 246 | 0     | 224 | 0     | 193 | 0     | 226 | 0     | 226 | 0     | 222 | 0     | 225 |
| SWT                          | 0       | 261 | 0      | 242 | 0      | 233 | 0      | 246 | 0     | 225 | 0     | 194 | 0     | 224 | 0     | 224 | 0     | 224 | 0     | 226 |
| TN                           | 0       | 253 | 0      | 235 | 0      | 229 | 0      | 243 | 0     | 218 | 0     | 183 | 0     | 219 | 0     | 216 | 0     | 216 | 1     | 218 |
| TSS                          | 51      | 251 | 43     | 238 | 40     | 230 | 8      | 244 | 11    | 219 | 5     | 193 | 4     | 224 | 9     | 224 | 5     | 222 | 7     | 225 |
| Turb                         | 0       | 252 | 0      | 239 | 0      | 230 | 0      | 243 | 0     | 224 | 0     | 194 | 0     | 225 | 0     | 224 | 0     | 224 | 0     | 225 |

2

**Table S2.** The monthly mean ( $\bar{x}$ ), standard deviation (SD), median (Med) and interquartile range (IQR) for dry and wet months of all physicochemical variables analyzed for all stations from November 1999 to October 2019.

| Variables               |           | Tributaries |             |        |            |            |             |            |       | Estuary    |             |       |             |       |             |       |       |       |       |            |       |
|-------------------------|-----------|-------------|-------------|--------|------------|------------|-------------|------------|-------|------------|-------------|-------|-------------|-------|-------------|-------|-------|-------|-------|------------|-------|
|                         |           | GORDYRD     |             | C24S49 |            | C23S48     |             | C44S80     |       | SE 09      |             | SE 06 |             | SE 03 |             | SE 02 |       | SE 01 |       | SE 11      |       |
|                         |           | Dry         | Wet         | Dry    | Wet        | Dry        | Wet         | Dry        | Wet   | Dry        | Wet         | Dry   | Wet         | Dry   | Wet         | Dry   | Wet   | Dry   | Wet   | Dry        | Wet   |
| NH <sub>3</sub><br>mg/L | $\bar{x}$ | 0.05        | <b>0.1</b>  | 0.04   | <b>0.1</b> | 0.04       | <b>0.1</b>  | 0.03       | 0.07  | 0.04       | <b>0.09</b> | 0.03  | 0.07        | 0.04  | <b>0.09</b> | 0.03  | 0.08  | 0.02  | 0.06  | 0.01       | 0.04  |
|                         | SD        | 0.05        | 0.09        | 0.05   | 0.1        | 0.04       | 0.1         | 0.03       | 0.08  | 0.04       | 0.07        | 0.03  | 0.07        | 0.04  | 0.07        | 0.03  | 0.08  | 0.02  | 0.07  | 0.02       | 0.06  |
|                         | Med       | 0.05        | 0.09        | 0.02   | 0.08       | 0.02       | <b>0.09</b> | 0.02       | 0.04  | 0.03       | <b>0.07</b> | 0.02  | 0.05        | 0.03  | <b>0.07</b> | 0.02  | 0.06  | 0.01  | 0.03  | 0.005      | 0.02  |
|                         | IQR       | 0.06        | 0.1         | 0.05   | 0.2        | 0.04       | 0.2         | 0.02       | 0.07  | 0.05       | 0.09        | 0.03  | 0.09        | 0.04  | 0.08        | 0.03  | 0.09  | 0.03  | 0.08  | 0.01       | 0.06  |
| N + N<br>mg/L           | $\bar{x}$ | 0.09        | 0.1         | 0.1    | 0.05       | 0.2        | 0.07        | <b>0.3</b> | 0.2   | <b>0.1</b> | <b>0.1</b>  | 0.04  | 0.06        | 0.08  | <b>0.1</b>  | 0.06  | 0.08  | 0.04  | 0.06  | 0.02       | 0.04  |
|                         | SD        | 0.07        | 0.1         | 0.1    | 0.07       | 0.2        | 0.1         | 0.2        | 0.2   | 0.1        | 0.1         | 0.05  | 0.07        | 0.1   | 0.1         | 0.09  | 0.09  | 0.07  | 0.08  | 0.04       | 0.06  |
|                         | Med       | 0.09        | 0.09        | 0.09   | 0.03       | 0.1        | 0.05        | <b>0.3</b> | 0.1   | <b>0.1</b> | 0.07        | 0.01  | 0.04        | 0.03  | 0.06        | 0.02  | 0.05  | 0.02  | 0.03  | 0.006      | 0.02  |
|                         | IQR       | 0.1         | 0.1         | 0.2    | 0.06       | 0.3        | 0.08        | 0.3        | 0.2   | 0.2        | 0.1         | 0.05  | 0.09        | 0.1   | 0.1         | 0.09  | 0.1   | 0.05  | 0.09  | 0.03       | 0.05  |
| TN<br>mg/L              | $\bar{x}$ | 0.81        | 1.2         | 1.2    | <b>1.4</b> | 1.1        | <b>1.4</b>  | 1.2        | 1.3   | 1.0        | <b>1.3</b>  | 0.78  | 1.0         | 0.70  | 1.1         | 0.58  | 0.91  | 0.46  | 0.73  | 0.35       | 0.55  |
|                         | SD        | 0.24        | 0.41        | 0.27   | 0.37       | 0.34       | 0.41        | 0.33       | 0.38  | 0.29       | 0.64        | 0.18  | 0.25        | 0.30  | 0.34        | 0.27  | 0.36  | 0.29  | 0.36  | 0.27       | 0.36  |
|                         | Med       | 0.75        | 1.2         | 1.3    | <b>1.5</b> | 1.1        | <b>1.5</b>  | 1.2        | 1.3   | 0.99       | <b>1.3</b>  | 0.80  | 1.0         | 0.67  | 1.0         | 0.59  | 0.89  | 0.47  | 0.74  | 0.34       | 0.52  |
|                         | IQR       | 0.34        | 0.53        | 0.42   | 0.56       | 0.44       | 0.56        | 0.40       | 0.43  | 0.29       | 0.30        | 0.24  | 0.38        | 0.39  | 0.51        | 0.38  | 0.50  | 0.38  | 0.54  | 0.27       | 0.48  |
| OP<br>mg/L              | $\bar{x}$ | 0.13        | <b>0.28</b> | 0.091  | 0.23       | 0.14       | 0.27        | 0.062      | 0.12  | 0.085      | 0.14        | 0.11  | <b>0.20</b> | 0.083 | 0.16        | 0.063 | 0.13  | 0.038 | 0.097 | 0.019      | 0.052 |
|                         | SD        | 0.084       | 0.22        | 0.086  | 0.16       | 0.099      | 0.16        | 0.031      | 0.086 | 0.032      | 0.061       | 0.046 | 0.104       | 0.030 | 0.075       | 0.033 | 0.079 | 0.033 | 0.075 | 0.026      | 0.055 |
|                         | Med       | 0.10        | 0.22        | 0.075  | 0.22       | 0.11       | <b>0.26</b> | 0.059      | 0.084 | 0.081      | 0.12        | 0.098 | <b>0.18</b> | 0.078 | 0.14        | 0.058 | 0.12  | 0.032 | 0.075 | 0.013      | 0.031 |
|                         | IQR       | 0.10        | 0.19        | 0.097  | 0.16       | 0.12       | 0.24        | 0.030      | 0.085 | 0.037      | 0.081       | 0.045 | 0.13        | 0.032 | 0.097       | 0.026 | 0.093 | 0.028 | 0.087 | 0.020      | 0.066 |
| TP<br>mg/L              | $\bar{x}$ | 0.18        | <b>0.35</b> | 0.14   | 0.31       | 0.20       | <b>0.35</b> | 0.13       | 0.20  | 0.16       | 0.21        | 0.16  | <b>0.27</b> | 0.12  | 0.22        | 0.092 | 0.18  | 0.061 | 0.14  | 0.037      | 0.084 |
|                         | SD        | 0.099       | 0.23        | 0.094  | 0.18       | 0.11       | 0.18        | 0.052      | 0.098 | 0.061      | 0.071       | 0.053 | 0.11        | 0.038 | 0.089       | 0.034 | 0.090 | 0.037 | 0.089 | 0.029      | 0.072 |
|                         | Med       | 0.14        | 0.31        | 0.12   | 0.29       | 0.17       | <b>0.33</b> | 0.11       | 0.16  | 0.15       | 0.19        | 0.15  | <b>0.26</b> | 0.12  | 0.21        | 0.086 | 0.16  | 0.058 | 0.11  | 0.032      | 0.060 |
|                         | IQR       | 0.12        | 0.23        | 0.12   | 0.18       | 0.15       | 0.27        | 0.052      | 0.13  | 0.052      | 0.076       | 0.057 | 0.14        | 0.039 | 0.12        | 0.030 | 0.10  | 0.030 | 0.10  | 0.025      | 0.069 |
| DO<br>mg/L              | $\bar{x}$ | 4.7         | 3.0         | 6.7    | 4.4        | <b>7.1</b> | 5.3         | 6.9        | 5.3   | 6.6        | 4.8         | 6.5   | 4.6         | 6.9   | 5.4         | 6.9   | 5.7   | 6.9   | 5.8   | <b>7.0</b> | 6.1   |
|                         | SD        | 1.8         | 1.9         | 1.8    | 2.7        | 1.5        | 1.7         | 1.5        | 1.8   | 1.2        | 1.7         | 1.2   | 1.4         | 0.91  | 1.1         | 0.94  | 0.99  | 0.94  | 0.81  | 0.95       | 0.86  |
|                         | Med       | 4.6         | 2.6         | 6.5    | 4.0        | <b>7.1</b> | 5.2         | 6.8        | 5.0   | 6.8        | 4.8         | 6.5   | 4.5         | 3.9   | 5.3         | 6.7   | 5.8   | 6.9   | 5.9   | <b>7.0</b> | 6.1   |
|                         | IQR       | 2.4         | 2.2         | 2.6    | 3.7        | 2.0        | 2.0         | 2.1        | 2.5   | 1.8        | 2.6         | 1.7   | 1.9         | 1.1   | 1.2         | 1.2   | 1.1   | 1.0   | 0.99  | 0.89       | 0.83  |
| Color<br>PCU            | $\bar{x}$ | 38          | 71          | 100    | <b>150</b> | 97         | 149         | 46         | 70    | 51         | <b>103</b>  | 44    | 79          | 30    | 69          | 23    | 59    | 14    | 44    | 7.8        | 26    |
|                         | SD        | 19          | 40          | 60     | 98         | 52         | 90          | 21         | 44    | 31         | 78          | 22    | 39          | 23    | 51          | 23    | 50    | 21    | 45    | 17         | 32    |

|                      |           |            |      |      |            |            |      |            |             |           |             |      |           |      |            |      |      |            |      |            |      |
|----------------------|-----------|------------|------|------|------------|------------|------|------------|-------------|-----------|-------------|------|-----------|------|------------|------|------|------------|------|------------|------|
|                      | Med       | 32         | 62   | 77   | <b>147</b> | 77         | 144  | 39         | 55          | 43        | 68          | 39   | <b>69</b> | 25   | 55         | 16   | 41   | 9          | 26   | 3          | 11   |
|                      | IQR       | 21         | 55   | 83   | 171        | 65         | 174  | 20         | 54          | 23        | 97          | 17   | 55        | 17   | 68         | 16   | 68   | 16         | 60   | 8          | 34   |
| TSS<br>mg/L          | $\bar{x}$ | 3          | 5    | 3    | 4          | 3          | 5    | 12         | <b>13</b>   | 10        | 10          | 7    | 8         | 10   | <b>12</b>  | 9    | 9    | 9          | 9    | 11         | 8    |
|                      | SD        | 7          | 7    | 2    | 5          | 3          | 7    | 16         | 15          | 11        | 8           | 4    | 4         | 8    | 8          | 9    | 6    | 7          | 7    | 9          | 7    |
|                      | Med       | 1          | 4    | 2    | 3          | 2          | 4    | <b>8</b>   | <b>8</b>    | 7         | 7           | 6    | 8         | 8    | <b>11</b>  | 6    | 8    | 8          | 7    | 8          | 7    |
|                      | IQR       | 2          | 5    | 3    | 4          | 3          | 4    | 9          | 11          | 6         | 7           | 4    | 5         | 7    | 9          | 6    | 5    | 4          | 5    | 8          | 6    |
| Turb.<br>NTU         | $\bar{x}$ | 2.8        | 3.8  | 3.1  | 3.2        | 4.4        | 3.9  | <b>17</b>  | 15          | <b>10</b> | 8.8         | 4.1  | 5.3       | 6.7  | <b>10</b>  | 4.5  | 7.1  | 4.2        | 6.1  | 3.9        | 4.9  |
|                      | SD        | 4.2        | 3.7  | 1.4  | 1.8        | 2.7        | 2.8  | 22         | 17          | 16        | 10          | 1.3  | 2.0       | 9.5  | 9.7        | 3.2  | 5.7  | 2.1        | 4.5  | 3.1        | 4.3  |
|                      | Med       | 2.3        | 2.8  | 2.9  | 2.8        | 3.8        | 3.3  | <b>9.4</b> | 8.9         | 4.8       | 5.6         | 4.1  | 5.1       | 4.2  | <b>7.2</b> | 3.7  | 5.0  | 3.7        | 4.8  | 3.4        | 3.9  |
|                      | IQR       | 1.8        | 2.6  | 1.8  | 1.1        | 2.2        | 1.6  | 12         | 9.7         | 3.5       | 5.3         | 1.6  | 2.2       | 3.2  | 5.5        | 2.2  | 4.8  | 2.3        | 3.1  | 2.0        | 3.4  |
| pH**                 | $\bar{x}$ | 7.3        | 7.1  | 7.6  | 7.2        | <b>7.9</b> | 7.2  | 7.6        | 7.3         | 7.6       | 7.2         | 7.5  | 7.3       | 7.8  | 7.5        | 7.9  | 7.6  | <b>7.9</b> | 7.7  | <b>7.9</b> | 7.8  |
|                      | SD        | 0.2        | 0.2  | 0.4  | 0.5        | 0.3        | 0.4  | 0.3        | 0.4         | 0.2       | 0.4         | 0.3  | 0.3       | 0.1  | 0.3        | 0.1  | 0.2  | 0.2        | 0.2  | 0.2        | 0.2  |
|                      | Med       | 7.4        | 7.2  | 7.8  | 7.3        | 7.8        | 7.4  | <b>7.8</b> | 7.5         | 7.6       | 7.5         | 7.6  | 7.4       | 7.8  | 7.6        | 7.9  | 7.8  | <b>8.0</b> | 7.9  | <b>8.0</b> | 7.9  |
|                      | IQR       | 7.6        | 7.5  | 7.7  | 7.1        | 7.7        | 7.2  | 7.9        | 7.5         | 7.8       | 7.6         | 7.7  | 7.5       | 8.1  | 7.8        | 8.3  | 8.1  | 8.4        | 8.2  | 8.3        | 8.2  |
| Sp.<br>Cond<br>mS/cm | $\bar{x}$ | <b>2.0</b> | 1.6  | 1.2  | 1.1        | 0.79       | 0.83 | 0.74       | 0.66        | 11        | 6.7         | 15   | 7.4       | 31   | 20         | 37   | 27   | 45         | 36   | <b>49</b>  | 43   |
|                      | SD        | 0.51       | 0.58 | 0.34 | 0.45       | 0.20       | 0.31 | 0.25       | 0.31        | 8.5       | 8.5         | 10   | 8.8       | 11   | 14         | 11   | 15   | 9.0        | 15   | 7.1        | 12   |
|                      | Med       | <b>2.0</b> | 1.6  | 1.2  | 0.97       | 0.78       | 0.82 | 0.70       | 0.56        | 11        | 0.92        | 13   | 2.8       | 32   | 19         | 40   | 28   | 47         | 41   | <b>51</b>  | 47   |
|                      | IQR       | 0.74       | 0.76 | 0.47 | 0.71       | 0.25       | 0.41 | 0.40       | 0.38        | 15        | 12          | 16   | 11        | 13   | 24         | 14   | 26   | 8.3        | 23   | 5.3        | 16   |
| SWT<br>°C            | $\bar{x}$ | 20.9       | 27.8 | 21.6 | 28.6       | 21.7       | 28.4 | 22.0       | <b>28.7</b> | 22.1      | <b>28.9</b> | 22.0 | 28.7      | 21.6 | 28.4       | 21.6 | 28.3 | 21.9       | 27.9 | 22.3       | 27.5 |
|                      | SD        | 2.9        | 1.6  | 2.6  | 1.7        | 2.6        | 1.6  | 2.7        | 1.7         | 2.6       | 1.7         | 2.8  | 2.0       | 2.7  | 1.7        | 2.7  | 1.6  | 2.6        | 1.5  | 2.4        | 1.5  |
|                      | Med       | 21.1       | 28.0 | 21.9 | 28.8       | 21.9       | 28.7 | 22.0       | <b>29.0</b> | 22.3      | <b>29.0</b> | 22.2 | 28.8      | 21.8 | 28.7       | 21.8 | 28.6 | 22.2       | 28.2 | 22.4       | 27.7 |
|                      | IQR       | 4.0        | 2.0  | 3.2  | 2.3        | 3.4        | 2.1  | 3.2        | 2.1         | 3.6       | 2.3         | 3.7  | 2.3       | 3.7  | 2.3        | 3.6  | 2.3  | 3.4        | 2.2  | 2.9        | 2.0  |

\* Numbers in bold are the largest mean values of a physicochemical variable for a tributary station and an estuary station.

\*\* The average and IQR for pH were determined as the negative logarithm of the average hydrogen ion concentration.
